# Supplementary material for: Role of the PRNP S127 allele in experimental infection of goats with classical caprine scrapie
Source: PubMed Central journal article supplement (PMC5132141; doi:10.1111/age.12291), 2015-04-27
Supplement: AGE-46-341-s003.pdf [file AGE-46-341-s003.pdf]

**Table S1.** Intracerebral inoculation of goat kids with homozygous (G/G<sub>127</sub>) or heterozygous (G/S<sub>127</sub>) brain-derived inocula prepared from clinically affected goats with naturally acquired classical caprine scrapie.

| Donor goats<br><i>PRNP</i><br>genotype | Recipient<br>kids <i>PRNP</i><br>genotype | Number of clinically<br>scrapie affected animals<br>/total number of animals | Scrapie incubation<br>period <sup>a</sup><br>(dpi, mean $\pm$ SD) | <u>PrP<sup>Sc</sup> detection</u><br>number of positive animals<br>/total number of animals<br>CNS <sup>b</sup> Lymphoid tissues <sup>c</sup> |                  |
|----------------------------------------|-------------------------------------------|------------------------------------------------------------------------------|-------------------------------------------------------------------|-----------------------------------------------------------------------------------------------------------------------------------------------|------------------|
| Previous studies                       |                                           |                                                                              |                                                                   |                                                                                                                                               |                  |
| G/G <sub>127</sub>                     | G/G <sub>127</sub>                        | 5/5                                                                          | 486 $\pm$ 21 <sup>d</sup>                                         | 5/5 <sup>d</sup>                                                                                                                              | 5/5 <sup>d</sup> |
| G/G <sub>127</sub>                     | G/G <sub>127</sub>                        | 5/5                                                                          | 557 $\pm$ 103 <sup>e</sup>                                        | 5/5 <sup>e</sup>                                                                                                                              | 5/5 <sup>e</sup> |
| Present study                          |                                           |                                                                              |                                                                   |                                                                                                                                               |                  |
| G/G <sub>127</sub>                     | G/G <sub>127</sub>                        | 3/3                                                                          | 289 $\pm$ 37                                                      | 3/3                                                                                                                                           | 3/3              |
| G/G <sub>127</sub>                     | G/S <sub>127</sub>                        | 2/2                                                                          | 647, 1333 <sup>f</sup>                                            | 2/2                                                                                                                                           | 2/2              |
| G/S <sub>127</sub>                     | G/G <sub>127</sub>                        | 2/2                                                                          | 343, 358 <sup>f</sup>                                             | 2/2                                                                                                                                           | 2/2              |

Abbreviations: G = glycine; S = serine; *PRNP* = prion gene; dpi = days post-inoculation; SD = standard deviations; PrP<sup>Sc</sup> = misfolded isoform of prion protein was detected by immunohistochemistry; <sup>a</sup>interval (days) from inoculation to appearance of clinical signs of scrapie; <sup>b</sup>CNS = central nervous system examined at or immediately posterior to the brainstem at the obex; <sup>c</sup>alimentary tract-associated lymphoid tissues (retropharyngeal, tonsil, mesenteric, ileocecal junction, ileum, and spleen), and peripheral lymph nodes (prescapular, prefemoral, and popliteal); <sup>d</sup>from Lacroux C. *et al* (2014) *J Virol* **88**, 2406-2413; <sup>e</sup>from Acutis P.L. *et al* (2012) *Vet Res* **43**, 8; <sup>f</sup>for experimental groups with fewer than 3 individuals, actual data values are reported instead of mean  $\pm$  SD.
